# Supplementary material for: miR-122 activates hepatitis C virus translation by a specialized mechanism requiring particular RNA components
Source: PubMed Central journal article supplement — Nucleic Acids Res. 2011 Jun 7;39(17):7716–29. doi: 10.1093/nar/gkr426 (PMC3177192; doi:10.1093/nar/gkr426), 2011-06-07
Supplement: supp_gkr426_supplementary_for_NAR.pdf [file supp_gkr426_supplementary_for_NAR.pdf]

**A**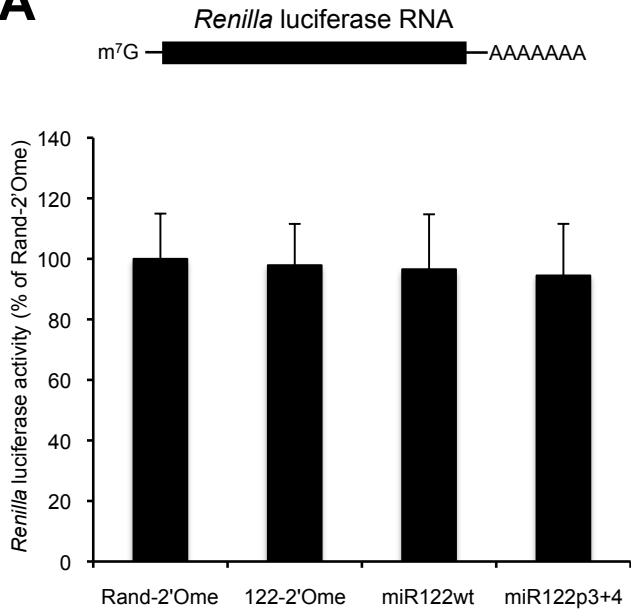**B**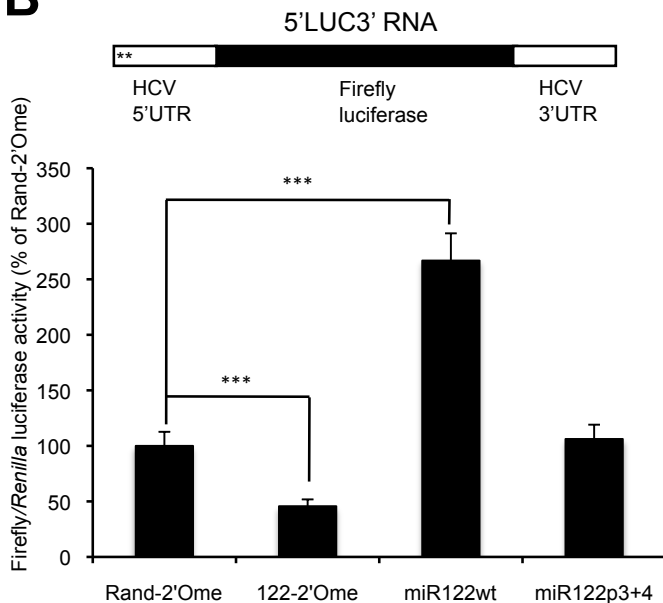**Supplementary Figure S1**

Translation of 5'LUC3' reporter RNA is stimulated by miR-122 following RNA transfections. (A) *Renilla* luciferase activity was not significantly affected by miR-122 sequestration or overexpression and is therefore a suitable transfection control. Capped, polyadenylated *Renilla* luciferase RNA was introduced into Huh7 cells with one of the following molecules: Rand-2'Ome, a randomized control 2'-O-methylated molecule; 122-2'Ome, a 2'-O-methylated oligomer complementary to miR-122; miR122wt, a synthetic wildtype miR-122 duplex; miR122p3+4, a synthetic miR-122 duplex with positions 3 and 4 of the seed mutated to their complement. The average *Renilla* luciferase activity of five independent triplicate transfections was determined at 6h post transfection and is shown relative to Rand-2'Ome values. Error bars represent standard deviation. (B) 5'LUC3' RNA was introduced into Huh7 cells with the *Renilla* luciferase RNA transfection control and each of the molecules in (A). Average firefly/*Renilla* luciferase activity from three independent triplicate experiments is shown as a percentage of the values obtained with Rand-2'Ome. Error bars represent standard deviation. Luciferase activity from 5'LUC3' RNA was reduced by 122-2'Ome and increased by miR122wt (\*\*\*,  $P < 0.0001$  compared to Rand-2'Ome), indicating that miR-122 stimulates luciferase expression.

**A**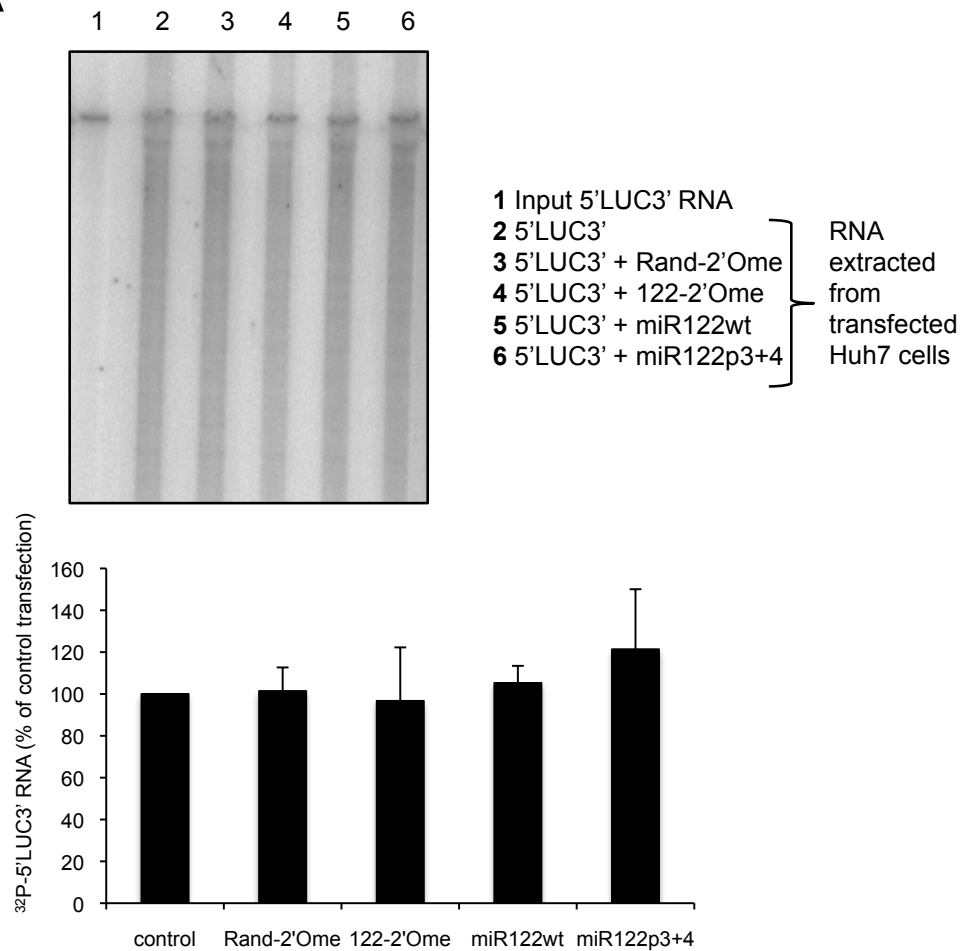**B**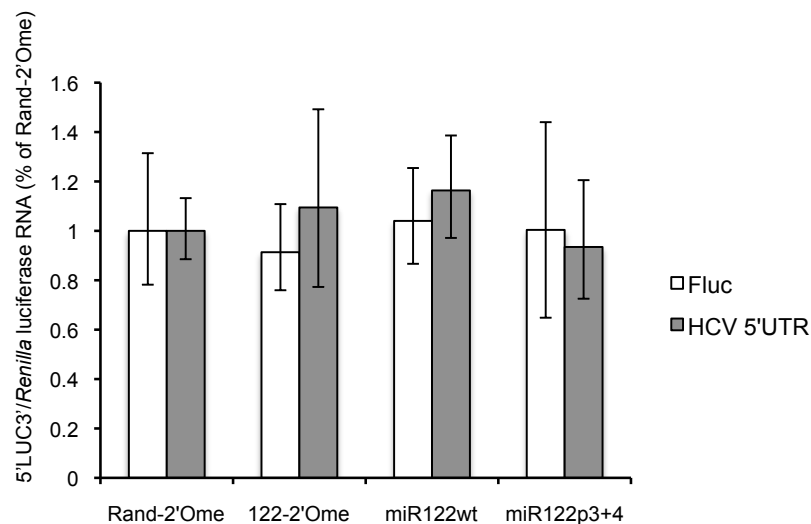

**Supplementary Figure S2** 5'LUC3' RNA stability is not affected by miR-122. (A)  $^{32}\text{P}$ -labelled 5'LUC3' RNA was introduced into Huh7 cells with sequestration or overexpression of miR-122. Total RNA was harvested at 6h post transfection and separated by denaturing polyacrylamide gel electrophoresis. Densitometry data were quantified from three independent experiments. RNA stability and integrity were not significantly affected by miR-122. (B) qPCR using primers targeted to either the firefly luciferase coding region or the HCV 5'UTR was carried out following RNA transfection as in Supplementary Figure S1B. RNA levels are shown as  $2^{-\Delta\Delta\text{Ct}}$  relative to the level of the *Renilla* luciferase transfection control RNA as a percentage of Rand-2'Ome values, and are an average of two independent experiments +/- standard deviation.

**A**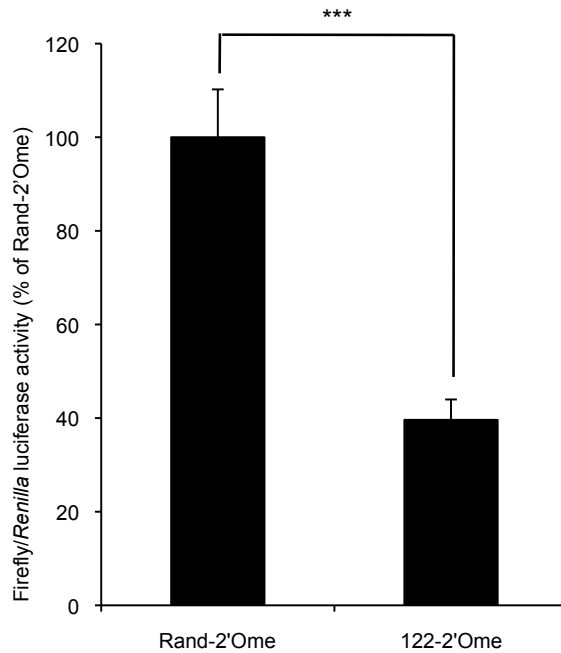**B**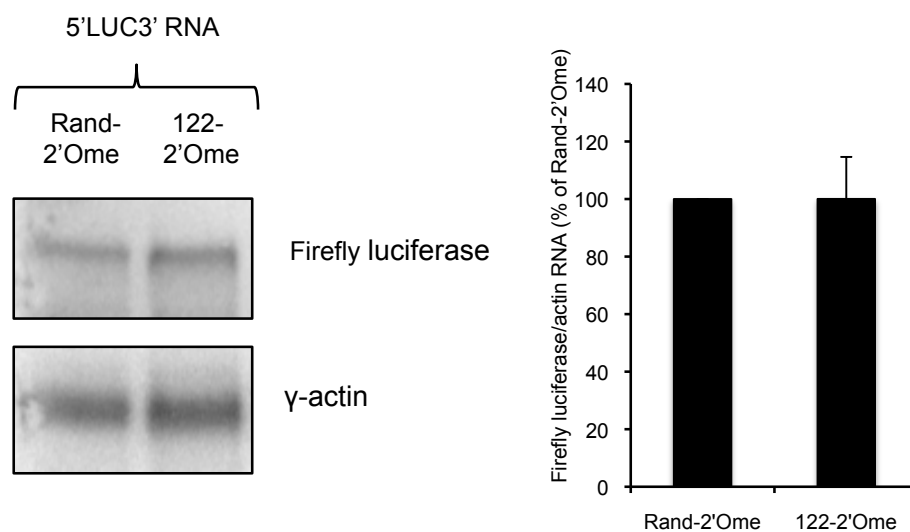**Supplementary Figure S3**

The method of transfection does not affect the response to miR-122. (A) 5'LUC3' RNA was introduced into Huh7 cells by electroporation with capped, polyadenylated, *Renilla* luciferase RNA as a transfection control, and either Rand-2'Ome or 122-2'Ome. Luciferase activity was measured at 6h post electroporation, and average firefly/*Renilla* luciferase activity, plus standard deviation, is shown as a percentage of the Rand-2'Ome values across three independent experiments. Sequestration of miR-122 reduced firefly luciferase activity (\*\*\*,  $P < 0.0001$ ). (B) Total RNA was extracted from the cells electroporated in (A), and firefly luciferase RNA levels determined by northern blotting. The membranes were re-probed for  $\gamma$ -actin as a loading control. Average firefly luciferase RNA levels quantified across two independent experiments are shown as a proportion of actin RNA relative to the Rand-2'Ome values, plus standard deviation. Sequestration of miR-122 did not affect firefly luciferase RNA levels.

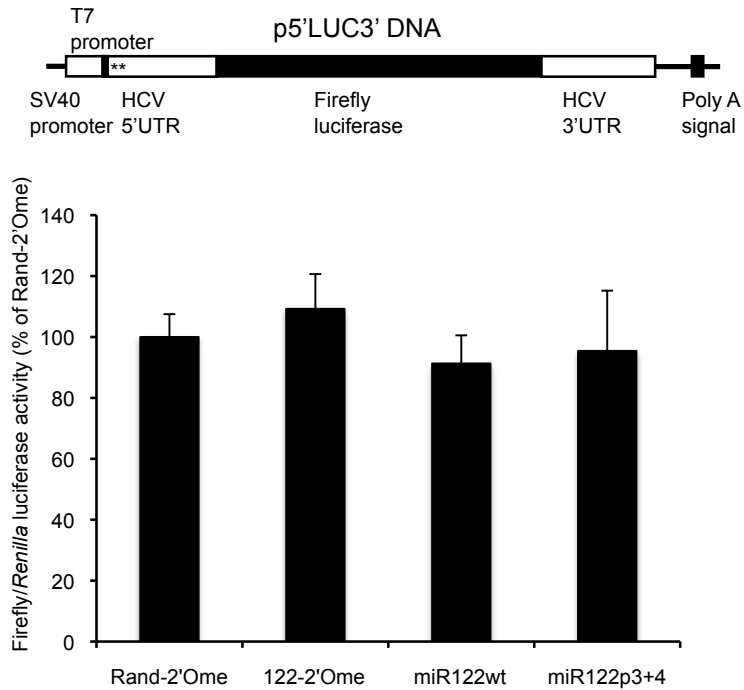

#### Supplementary Figure S4

miR-122 does not regulate HCV 5'UTR-driven translation following DNA transfection. The p5'LUC3' reporter was introduced into Huh7 cells by DNA transfection with sequestration or overexpression of miR-122, with pSV40-RL as a transfection control. Firefly/*Renilla* luciferase activity was determined as a percentage of Rand-2'Ome values of three independent triplicate experiments at 48h post transfection. Error bars represent standard deviation. miR-122 did not significantly affect firefly luciferase expression.

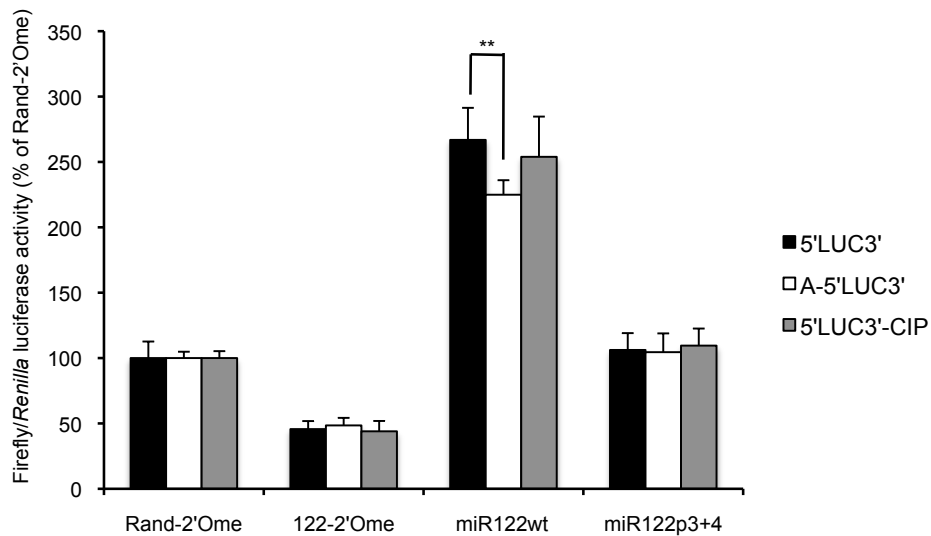

### Supplementary Figure S5

Activation of translation by miR-122 binding to the HCV 5'UTR does not require a 5'-triphosphate on HCV 5'UTR RNA. 5'LUC3' RNA bearing an inactive 5' ApppG cap, or treated with calf intestinal alkaline phosphatase (CIP) to leave a monophosphorylated 5' end, was introduced into Huh7 cells with sequestration or overexpression of miR-122 and with a capped, polyadenylated *Renilla* luciferase RNA transfection control. Data represent firefly/*Renilla* luciferase activity as a percentage of Rand-2'Ome values for each RNA. Values are an average of three independent triplicate experiments, and error bars represent standard deviation. An A-cap slightly inhibited activation of translation by miR122wt (\*\*,  $P < 0.001$ ), but did not affect repression by 122-2'Ome. Regulation of monophosphorylated 5'LUC3' RNA did not differ significantly from that of triphosphorylated 5'LUC3' RNA.

**A**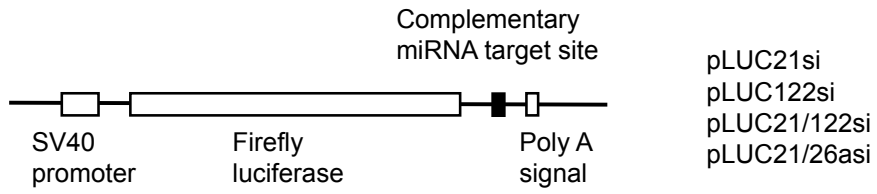**B**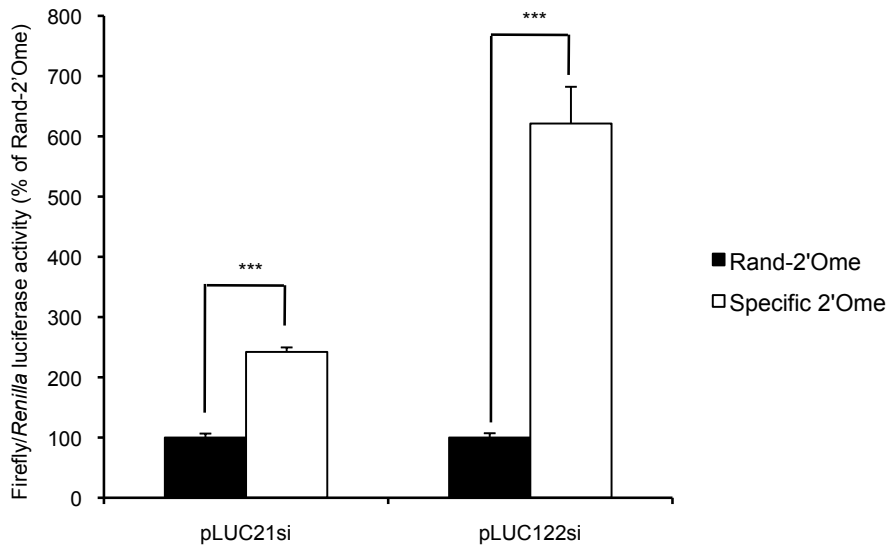**C**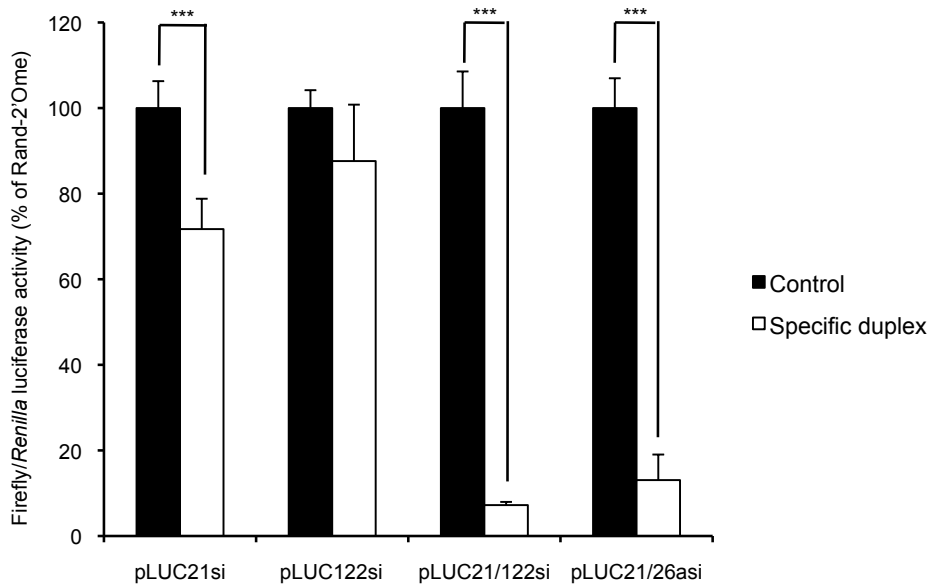

### Supplementary Figure S6

Luciferase reporters with exactly complementary binding sites for wildtype and chimeric miRNAs demonstrate that sequestration and overexpression are effective. (A) A single complementary site for miR21wt, miR122wt, miR21/122 or miR21/26a was introduced into the 3'UTR of a firefly luciferase reporter plasmid. The miRNA is expected to bind to its complementary site and act as an siRNA, resulting in cleavage and degradation of the reporter mRNA. (B) pLUC122si and pLUC21si vectors were introduced into Huh7 cells with a randomized control 2'-O-methylated oligomer (Rand-2'Ome) or a specific complementary 2'-O-methylated oligomer to sequester endogenous miR-21 or miR-122 (21-2'Ome or 122-2'Ome). Both oligomers effectively derepressed luciferase activity from the appropriate plasmid. miR-122 is expressed at higher levels than miR-21 in Huh7 cells, and therefore pLUC122si shows a greater response to sequestration of the corresponding miRNA. Firefly luciferase activity is shown relative to *Renilla* luciferase activity from a pSV40-RL transfection control as a percentage of Rand-2'Ome values for each plasmid. (C) Wildtype miR-122 or miR-21 or chimeric miR21/122 or miR21/26a duplexes were introduced into Huh7 cells with the appropriate luciferase sensor plasmids. Luciferase activity from the wildtype sensor plasmids was already effectively repressed by endogenous miRNAs and was not greatly affected by the transfected miRNA. The chimeric miRNAs strongly reduced luciferase activity from the corresponding sensor plasmids. Firefly luciferase activity is shown relative to *Renilla* luciferase activity from a pSV40-RL transfection control as a percentage of data obtained in the absence of miRNA overexpression for each plasmid. All data are an average of three independent triplicate experiments. Error bars represent standard deviation. (\*\*\*)  $P < 0.0001$

**A**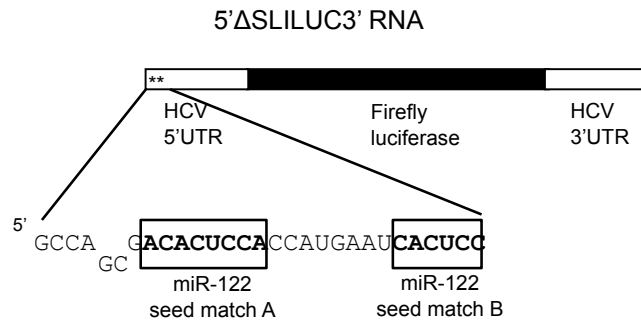**B**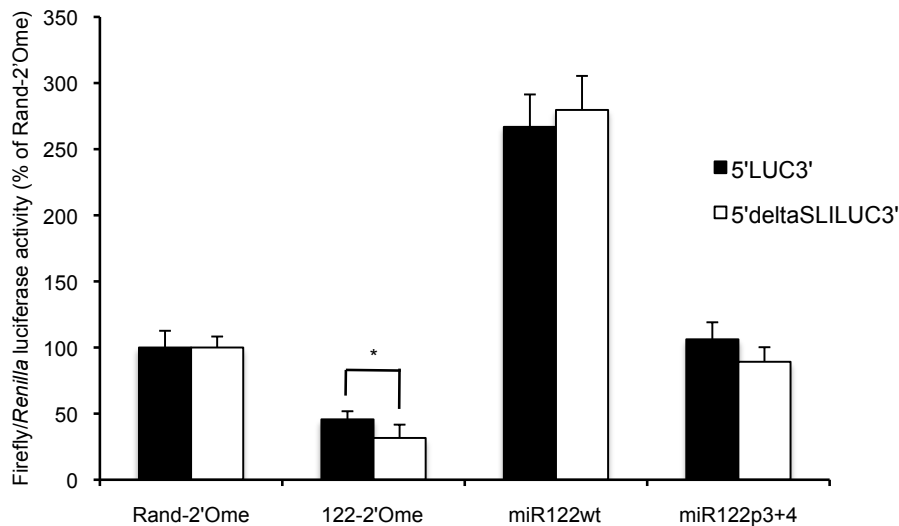**Supplementary Figure S7**

Stem-loop I (SLI) is not required for miR-122 to activate translation via the HCV 5'UTR. (A) SLI, comprising nt 6-19 of HCV RNA, was deleted from the plasmid encoding 5'LUC3' RNA. (B) 5' $\Delta$ SLILUC3' RNA was introduced into Huh7 cells with a capped, polyadenylated *Renilla* luciferase RNA transfection control, with sequestration or overexpression of miR-122. Firefly/*Renilla* luciferase activity is shown as a percentage of Rand-2'Ome data. Values are an average of three independent triplicate experiments, plus standard deviation. Repression of translation by 122-2'Ome was slightly enhanced by the  $\Delta$ SLI mutation (\*,  $P < 0.01$ ) but activation by miR122wt was not significantly affected.



**A**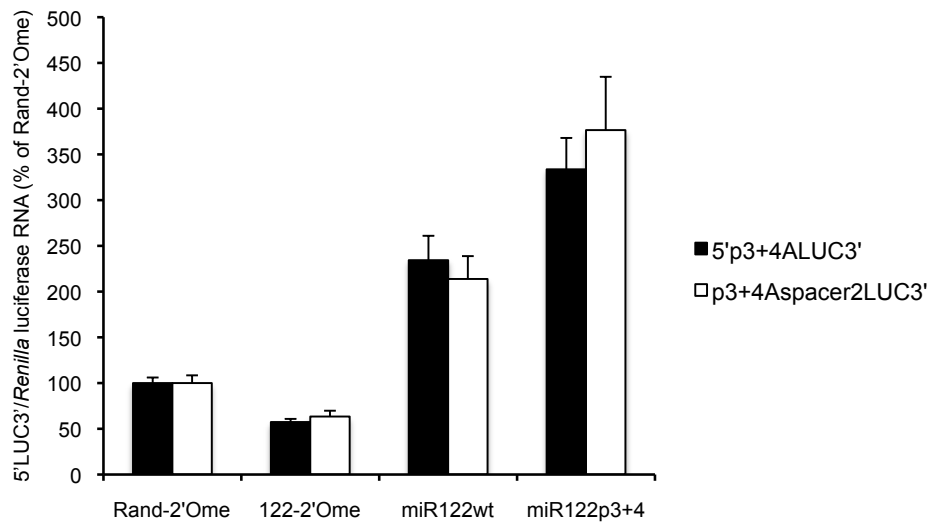**B**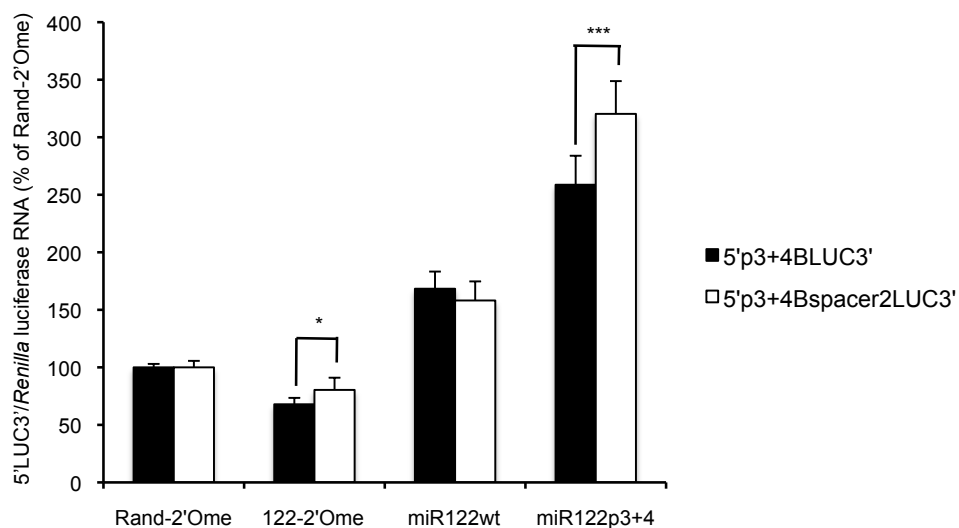**Supplementary Figure S8**

Insertion of an additional 8nt spacer sequence downstream of seed match B does not consistently alter regulation of translation via either seed match. (A) 5'p3+4Aspacer2LUC3' was generated by insertion of an 8nt spacer sequence downstream of seed match B as in Figure 5C, except that seed match A was mutated at p3+4 to allow regulation via each of the seed matches to be distinguished. There were no changes in regulation via either seed match in the presence of spacer2. (B) As (A), except that seed match B was mutated at p3+4 and seed match A was wildtype. Spacer2 induced a small but significant decrease in the effects of 122-2'Ome, and an increase in translation activation by miR122p3+4 binding to seed match B (\*,  $P < 0.01$ ; \*\*\*,  $P < 0.0001$ ). However, when the data in (A) and Figure 5C are taken into account, we conclude that there is no specific effect of the additional spacer on translation regulation via either seed match. Firefly luciferase activity is shown relative to *Renilla* luciferase activity from the transfection control as a percentage of Rand-2'Ome data. Values are an average of three independent triplicate experiments, plus standard deviation.

## **Supplementary methods**

### **Electrophoresis of radiolabeled RNA**

To determine whether miR-122 affects the integrity of HCV IRES RNA, radiolabeled 5'LUC3' RNA was synthesized by including  $\alpha$ -<sup>32</sup>P CTP in the transcription reaction. This RNA was used in lipofectamine 2000 transfections of Huh7 cells in a 6 well plate, and total RNA was isolated after 6h. The RNA was separated on a denaturing 4% polyacrylamide/7M urea/1x TBE gel. The gel was dried and visualized by autoradiography.

**Supplementary Table S1: DNA oligonucleotide sequences**

|                |                                                                  |
|----------------|------------------------------------------------------------------|
| 5'UTR F        | GACGGCCAGTGCCAAGCTTACTTGGTCAG                                    |
| 5'UTR R        | GTTGGTGTACCCATGGTTTTTCTTTGAGG                                    |
| 3'UTR F        | GCATCTACCTCCTCCCCAACTAGTGAAGG                                    |
| 3'UTR R        | GGAGAATGCCATGCGAATTCACATGATCTGC                                  |
| 5'core R       | GACGAATTCCAGTCTAGACTCCCTTAGCC                                    |
| 1-45 R         | CAGTAGTTCCTCCATGGGGAGTGATTCATG                                   |
| CSFV F         | GATTTGGTCCATGGCACCCCTCCAG                                        |
| CSFV R         | CTGGAGGGCGCCATGGTTGGTTTTG                                        |
| FMDV F         | GACACCCATGGTGCAACTTGAAACTCC                                      |
| FMDV R         | CAGTCAGTTGTATCCATGGGTTTCAGTGG                                    |
| Kpn F          | CTCTATCGATAGGTACCGAGCTCTTAC                                      |
| LUC R          | GCAGTTGCTCTCCAGCGGTTCCATCTTCC                                    |
| Bss F          | GTGCAGCCTCCAGGGCGCGCCCTCC                                        |
| Bss R          | GGAGGGGCGCGCCTGGAGGCTGCAC                                        |
| CSFVIII F      | CTCCCGCGCGCACCCCTCCAGCGACG                                       |
| m21A F         | GATGGGGGCCATAAGCTACCATGAATCACTC                                  |
| m21A R         | GAGTGATTCATGGTAGCTTATCGCCCCATC                                   |
| m21B F         | CCATGAATTAAGCTCCTGTGAGGAACTAC                                    |
| m21B R         | GTAGTTCCTCACAGGAGCTTAATTCATGG                                    |
| H77Xmn F       | GCTCATCATTGGAAAACGTTCTTCGGGGCG                                   |
| H77Kpn R       | GCCAAGGGTACCCGGGCTGAGCCAGGTCC                                    |
| p3+4A F        | GATGGGGGCGACACAGCACCATGAATCACTC                                  |
| p3+4A R        | GAGTGATTCATGGTGCTGTGTCGCCCCATC                                   |
| p3+4B F        | CCATGAATCACAGCCCTGTGAGGAACTAC                                    |
| p3+4B R        | GTAGTTCCTCACAGGGCTGTGATTCATGG                                    |
| m2-4 F         | CGACTCACTATAGGGTGCCCCCTGATG                                      |
| m2-4 R         | CATCAGGGGGCACCCCTATAGTGAGTCG                                     |
| m30-7 F        | GCGACACTCCAGGTACTTACACTCCCCTGTG                                  |
| m30-7 R        | CACAGGGGAGTGTAAGTACCTGGAGTGTCGC                                  |
| m21EXT F       | CTAATACGACTCACTATAGCCAGCGATAAGCTACCATGAA<br>TTAAGCTAGCCAGCCCCCTG |
| m21EXT R       | CAGGGGGCTGGCTAGCTTAATTCATGGTAGCTTATCGCTGG<br>CTATAGTGAGTCGTATTAG |
| wtEXT F        | CTAATACGACTCACTATAGCCAGCGACACTCCACCATGAATCACTCCA<br>GCCAGCCCCCTG |
| wtEXT R        | CAGGGGGCTGGCTGGAGTGATTCATGGTGGAGTGCTGGCTATAGTG<br>AGTCGTATTAG    |
| spacer2 F      | CATGAATCACTCCGGTACTTACCTGTGAGGAAC                                |
| spacer2 R      | GTTCCACACAGGTAAGTACCGGAGTGATTCATG                                |
| p3+4Bspacer2 F | CATGAATCACAGCGGTACTTACCTGTGAGGAAC                                |
| p3+4Bspacer2 R | GTTCTCACAGGTAAGTACCGCTGTGATTCATG                                 |
| ΔSLI F         | CGACTCACTATAGCCAGCGACACTCCACC                                    |
| ΔSLI R         | GGTGGAGTGTGCTGGCTATAGTGAGTCG                                     |
| mutLRA F       | GGTGGCGGTCAGATCGTAGGAGGTGTTTAC                                   |
| mutLRA R       | GTAACACCTCCTACGATCTGACCGCCACC                                    |
| LUC F          | GAAAGGCCCGCGCCATTCTATCCGC                                        |
| 21si R         | CGGGAATTCTAGCTTATCAGACTGATGTTGAGCGGCCGCACTAG                     |
| 122si R        | CGGGAATTCTGGAGTGTGACAATGGTGTGTTGTGCGGCCGCACTAG                   |
| 21/122si R     | CGGGAATTCTAGCTTATGACAATGGTGTGTTGTGCGGCCGCACTAG                   |

**Supplementary Table S1, continued**

|              |                                                               |
|--------------|---------------------------------------------------------------|
| 21/26asi R   | CGGGAATTCTAGCTTATATCCAGGATAGGCTGCGGCCGCACTAG                  |
| Ago1 QF      | CAGGGGGCTGGCTGGAGTGATTCATGGTGGAGTGCTGGCTATAGTG<br>AGTCGTATTAG |
| Ago1 QR      | CATTCGCCAGCTCACAATGGCT                                        |
| Ago2 QF      | CGCGTCCGAAGGCTGCTCTA                                          |
| Ago2 QR      | TGGCTGTGCCTTGTAACACGCT                                        |
| TNRC6A QF    | CTCTGTGGATGCTCCTGAAAG                                         |
| TNRC6A QR    | TGCTTGGATTAAACCCTCCATT                                        |
| TNRC6B QF    | GGAAATTGGAGGAATGTGAGTG                                        |
| TNRC6B QR    | GGATGTCTGACCTACTGTGCT                                         |
| Dicer QF     | TGGTCAACTCTGCAAACCAG                                          |
| Dicer QR     | CAAGGCGACATAGCAAGTCA                                          |
| GAPDH QF     | AAGGTGAAGGTCGGAGTCAA                                          |
| GAPDH QR     | GAAGATGGTGTGATGGGATTT                                         |
| Actin QF     | AGCACAGAGCCTCGCCTTT                                           |
| Actin QR     | TCATCATCCATGGTGAGCTG                                          |
| Fluc QF      | TCGCCAGTCAAGTAACAAC                                           |
| Fluc QR      | ACTTCGTCCACAAACACAA                                           |
| HCV 5'UTR QF | GCGACACTCCACCATGAAT                                           |
| HCV 5'UTR QR | GGTTCCGCAGACCACTATG                                           |
| Rluc QF      | AACGCGGCCTCTTCTTATTT                                          |
| Rluc QR      | GTCTGGTATAATACACCGCG                                          |

**Supplementary Table S2: 2'-O-methylated oligonucleotide sequences**

|            |                         |
|------------|-------------------------|
| 122-2'Ome  | ACAAACACCAUUGUCACACUCCA |
| Rand-2'Ome | GUGUAACACGUCUAUACGCCCAA |
| 21-2'Ome   | UCACAUCAGUCUGAUAAGCUA   |

**Supplementary Table S3: RNA oligonucleotide sequences**

|                 |                         |
|-----------------|-------------------------|
| miR122wt        | UGGAGUGUGACAAUGGUGUUUGU |
| miR122p3+4      | UGCUGUGUGACAAUGGUGUUUGU |
| miR122*         | AAACGCCAUUAUCACACUAAAUA |
| miR21wt         | UAGCUUAUCAGACUGAUGUUGA  |
| miR21*          | AACACCAGUCGAUGGGUUGUC   |
| miR21/122       | UAGCUUAUGACAAUGGUGUUUGU |
| miR21/122*      | AAACGCCAUUAUCAUGGGUUGUC |
| miR21/26a       | UAGCUUAUAUCCAGGAUAGGCU  |
| miR21/26a*      | CCUAUUCUUGGUAUGGGUUGUC  |
| miR21p16        | UAGCUUAUCAGACUGGUGUUGA  |
| miR21/122p9,11  | UAGCUUAUCAGAAUGGUGUUUGU |
| miR21/122p9,11* | AAACGCCAUUAUGAUGGGUUGUC |
| miR21/122p16    | UAGCUUAUGACAAUGAUGUUUGU |
| miR21/122p16*   | AAACGUCAUUAUCAUGGGUUGUC |
| miR21/122p21-3  | UAGCUUAUGACAAUGGUGUUGA  |
